# Supplementary material
Source: PubMed Central journal article supplement (PMC1502536)
Supplement: pnas_0601283103_4.pdf [file pnas_0601283103_4.pdf]

g1 | 3212951 | \* 20 40 60 80 100 120 140 160  
---C-PCNGTKRLPALKLALEYVPCNKRICVVDVDRGRETGQQIG-DEVRALHDTCKPFDGQVVSQK-SDSSKX-IRGQKNTVEGKE-PCGCTIGLLI SS D D ITRCS-CKLGMRYINGRKTAMV QV GNC TGV HEVDFNFGCG  
g1 | 2827476 | ---NKRICVVDVDRGRETGQQIG-DEVRALHDTCKPFDGQVVSQK-SDSSKX-IRGQKNTVEGKE-PCGCTIGLLI SS D D ITRCS-CKLGMRYINGRKTAMV QV GNC TGV HEVDFNFGCG  
g1 | 1348907 | PCNGTKRLPALKLALEYVPCNKRICVVDVDRGRETGQQIG-DEVRALHDTCKPFDGQVVSQK-SDSSKX-IRGQKNTVEGKE-PCGCTIGLLI SS D D ITRCN-CKLGSYKINGRKTAMV QV GNC TGV HEVDFNFGCG  
g1 | 2445900 | PCNGSSASQ-CLAAREVPCNKRICVVDVDRGRETGQQIG-DEVRALHDTCKPFDGQVVSQK-SDSSKX-IRGQKNTVEGKE-PCGCTIGLLI SS D D ITRCN-CKLGMRYINGRKTAMV QV GNC TGV HEVDFNFGCG  
g1 | 2129278 | PCFFVDFSSDLDKCRVDRNWKVAVCLDNDGEGRGGVIG-DEVTGHTSSVFRDQGVVSNRGNLNRH-IRGQKNTVEGKE-PCGCTIGLLI SS D D ITRCN-CKLGMRYINGRKTAMV QV GNC TGV HEVDFNFGCG  
g1 | 1818284 | LREYVDFSSDLDKCRVDRNWKVAVCLDNDGEGRGGVIG-DEVTGHTSSVFRDQGVVSNRGNLNRH-IRGQKNTVEGKE-PCGCTIGLLI SS D D ITRCN-CKLGMRYINGRKTAMV QV GNC TGV HEVDFNFGCG  
g1 | 2863116 | LREEAQSPAPERLADVPCRYVICWKNDRGAVLGGVIG-DEVTGHTSSVFRDQGVVSNRGNLNRH-IRGQKNTVEGKE-PCGCTIGLLI SS D D ITRCN-CKLGMRYINGRKTAMV QV GNC TGV HEVDFNFGCG  
g1 | 1454714 | LMEALASPEPRLADVPCRYVICWKNDRGAVLGGVIG-DEVTGHTSSVFRDQGVVSNRGNLNRH-IRGQKNTVEGKE-PCGCTIGLLI SS D D ITRCN-CKLGMRYINGRKTAMV QV GNC TGV HEVDFNFGCG  
g1 | 1454724 | PLGHIMRLDLEKIALEYVPCHEVFCYLDNDGEGVGGDGL-ERVKQLHYNIALRDQGVAGPRAGVSKRH-IRGQKNTVEGKE-PCGCTIGLLI SS D D ITRCN-CKLGMRYINGRKTAMV QV GNC TGV HEVDFNFGCG  
g1 | 4694784 | PLGHIMRLDLEKIALEYVPCHEVFCYLDNDGEGVGGDGL-ERVKQLHYNIALRDQGVAGPRAGVSKRH-IRGQKNTVEGKE-PCGCTIGLLI SS D D ITRCN-CKLGMRYINGRKTAMV QV GNC TGV HEVDFNFGCG  
g1 | 4067443 | PLGHIMRLDLEKIALEYVPCHEVFCYLDNDGEGVGGDGL-ERVKQLHYNIALRDQGVAGPRAGVSKRH-IRGQKNTVEGKE-PCGCTIGLLI SS D D ITRCN-CKLGMRYINGRKTAMV QV GNC TGV HEVDFNFGCG  
g1 | 7296772 | ---RERRYEDLCRNISDNYQYLSVDDIGMETGLKLI-NEVRSMYNAQFQDQGVVNTQTPDAPAVRGDKIRGQKNTVEGKE-PCGCTIGLLI SS D D ITRCN-CKLGMRYINGRKTAMV QV GNC TGV HEVDFNFGCG  
g1 | 2317043 | ---NYQYLSVDDIGMETGLKLI-NEVRSMYNAQFQDQGVVNTQTPDAPAVRGDKIRGQKNTVEGKE-PCGCTIGLLI SS D D ITRCN-CKLGMRYINGRKTAMV QV GNC TGV HEVDFNFGCG  
g1 | 2015177 | SFMGGSERRYEDLCRNISDNYQYLSVDDIGMETGLKLI-NEVRSMYNAQFQDQGVVNTQTPDAPAVRGDKIRGQKNTVEGKE-PCGCTIGLLI SS D D ITRCN-CKLGMRYINGRKTAMV QV GNC TGV HEVDFNFGCG  
g1 | 3959333 | VNLHQAMVRLRYIAEIRSNNEFQAVVNDVGSQHYKYTA-KEIELRYELFLFGQGVMEKGNKDESHIK-D-IRSDHEVYDGRDTRAKDAATVRLLSMISLQIHFK-KRIDNDIGGRSAMLIDGNC TGV HEVDFNFGCG  
g1 | 5923812 | LSHQAMVRLRYIAEIRSNNEFQAVVNDVGSQHYKYTA-KEIELRYELFLFGQGVMEKGNKDESHIK-D-IRSDHEVYDGRDTRAKDAATVRLLSMISLQIHFK-KRIDNDIGGRSAMLIDGNC TGV HEVDFNFGCG  
g1 | 2302765 | IPIRALPINKQTLQDLDAMLRVGSINAEAVPASA-HALYQQAQRKRLRPAAGIGRAQSHVDRS-VRQSDSLTA-ES-AGAEVAVAS-SPVQALN-ROLL-LGLFVSEFHF-IRF-PGCGVREDFVQGEA  
g1 | 2299868 | KMDVAETLLQNLHFESV-VOHQRYVYCGQGNLPMLLAHS-VEYVTAQCGVHLRAGVGRAGSHVDRS-VRQSDSLTA-ES-AGAEVAVAS-SPVQALN-ROLL-LGLFVSEFHF-IRF-PGCGVREDFVQGEA  
g1 | 2736175 | ---MKNDAATVAYVDDISEEDVYVDR-DCIP-ENWQKAR-GRNDVTLKATK-IRSDHEVYDGRDTRAKDAATVRLLSMISLQIHFK-KRIDNDIGGRSAMLIDGNC TGV HEVDFNFGCG  
g1 | 2880644 | ---MKNDAATVAYVDDISEEDVYVDR-DCIP-ENWQKAR-GRNDVTLKATK-IRSDHEVYDGRDTRAKDAATVRLLSMISLQIHFK-KRIDNDIGGRSAMLIDGNC TGV HEVDFNFGCG  
g1 | 9658386 | ---MRMADGDAADAVVDDINPQVQVAVR-BCIP-ENWQKAR-GRNDVTLKATK-IRSDHEVYDGRDTRAKDAATVRLLSMISLQIHFK-KRIDNDIGGRSAMLIDGNC TGV HEVDFNFGCG  
g1 | 2434981 | ---MVSQLESVDDVADAVDKVIPELPAHISQVLI-EKQVATTEI-HELKAS-GRGAEQLNPD-IRGQKNTVEGKE-PCGCTIGLLI SS D D ITRCN-CKLGMRYINGRKTAMV QV GNC TGV HEVDFNFGCG  
g1 | 4618777 | TMHAMRISDPHL-LRRDVAANWSQNIQTEALTLVLA-A-CECRKRAAE-LELEPA-CKGPALQIREG-IRGQKNTVEGKE-PCGCTIGLLI SS D D ITRCN-CKLGMRYINGRKTAMV QV GNC TGV HEVDFNFGCG  
g1 | 2885566 | DTMHMRISDPHLLR-DDVAANWSQNIQTEALTLVLA-A-CECRKRAAE-LELEPA-CKGPALQIREG-IRGQKNTVEGKE-PCGCTIGLLI SS D D ITRCN-CKLGMRYINGRKTAMV QV GNC TGV HEVDFNFGCG  
g1 | 2498695 | ---MHISPEHPH-LAAVDDAATHWSQNIQTEALTLVLA-A-CECRKRAAE-LELEPA-CKGPALQIREG-IRGQKNTVEGKE-PCGCTIGLLI SS D D ITRCN-CKLGMRYINGRKTAMV QV GNC TGV HEVDFNFGCG  
g1 | 2306094 | TMHMRISDPHL-LRRDVAANWSQNIQTEALTLVLA-A-CECRKRAAE-LELEPA-CKGPALQIREG-IRGQKNTVEGKE-PCGCTIGLLI SS D D ITRCN-CKLGMRYINGRKTAMV QV GNC TGV HEVDFNFGCG  
g1 | 9946156 | LQTMHMRISDPHL-LRRDVAANWSQNIQTEALTLVLA-A-CECRKRAAE-LELEPA-CKGPALQIREG-IRGQKNTVEGKE-PCGCTIGLLI SS D D ITRCN-CKLGMRYINGRKTAMV QV GNC TGV HEVDFNFGCG  
g1 | 3204348 | ---MHNINWPHL-LRRDVAANWSQNIQTEALTLVLA-A-CECRKRAAE-LELEPA-CKGPALQIREG-IRGQKNTVEGKE-PCGCTIGLLI SS D D ITRCN-CKLGMRYINGRKTAMV QV GNC TGV HEVDFNFGCG  
g1 | 2310577 | RIAMSPISDPHL-LRRDVAANWSQNIQTEALTLVLA-A-CECRKRAAE-LELEPA-CKGPALQIREG-IRGQKNTVEGKE-PCGCTIGLLI SS D D ITRCN-CKLGMRYINGRKTAMV QV GNC TGV HEVDFNFGCG  
g1 | 3410249 | VHSAMKQMTQLQDLDVADAVDKVIPELPAHISQVLI-EKQVATTEI-HELKAS-GRGAEQLNPD-IRGQKNTVEGKE-PCGCTIGLLI SS D D ITRCN-CKLGMRYINGRKTAMV QV GNC TGV HEVDFNFGCG  
g1 | 3957617 | ---MKQNTINLNDLRD-EDDADHWAVASEVDFECLDA-A-CEQNLNSALFNKAS-GRSATTVNAE-IRSDHEVYDGRDTRAKDAATVRLLSMISLQIHFK-KRIDNDIGGRSAMLIDGNC TGV HEVDFNFGCG  
g1 | 2313587 | ---MSSFEFVDSYIETRVGLADVNDLNTLSLR-NHLLIHADNMLAHTGNSQINIVPDKK-VAGDSVSDRS-YYNIHENDVQD-EAFYSLVN-KVCF-TGKIAEFHYTIE-CAAEVREDFVQGEA  
g1 | 2882825 | DLTSNLTATENKTFPKNS-NOPEKCVLITLND-ENLNKIP-THYDYSYQKFNKMLTAG-NGKTDGWDKX-IRSDHEVYDGRDTRAKDAATVRLLSMISLQIHFK-KRIDNDIGGRSAMLIDGNC TGV HEVDFNFGCG

g1 | 3212951 | \* 180 200 220 240 260 280  
---C-PCNGTKRLPALKLALEYVPCNKRICVVDVDRGRETGQQIG-DEVRALHDTCKPFDGQVVSQK-SDSSKX-IRGQKNTVEGKE-PCGCTIGLLI SS D D ITRCS-CKLGMRYINGRKTAMV QV GNC TGV HEVDFNFGCG  
g1 | 2827476 | ---NKRICVVDVDRGRETGQQIG-DEVRALHDTCKPFDGQVVSQK-SDSSKX-IRGQKNTVEGKE-PCGCTIGLLI SS D D ITRCS-CKLGMRYINGRKTAMV QV GNC TGV HEVDFNFGCG  
g1 | 1348907 | PCNGTKRLPALKLALEYVPCNKRICVVDVDRGRETGQQIG-DEVRALHDTCKPFDGQVVSQK-SDSSKX-IRGQKNTVEGKE-PCGCTIGLLI SS D D ITRCN-CKLGSYKINGRKTAMV QV GNC TGV HEVDFNFGCG  
g1 | 2445900 | PCNGSSASQ-CLAAREVPCNKRICVVDVDRGRETGQQIG-DEVRALHDTCKPFDGQVVSQK-SDSSKX-IRGQKNTVEGKE-PCGCTIGLLI SS D D ITRCN-CKLGMRYINGRKTAMV QV GNC TGV HEVDFNFGCG  
g1 | 2129278 | PCFFVDFSSDLDKCRVDRNWKVAVCLDNDGEGRGGVIG-DEVTGHTSSVFRDQGVVSNRGNLNRH-IRGQKNTVEGKE-PCGCTIGLLI SS D D ITRCN-CKLGMRYINGRKTAMV QV GNC TGV HEVDFNFGCG  
g1 | 1818284 | LREYVDFSSDLDKCRVDRNWKVAVCLDNDGEGRGGVIG-DEVTGHTSSVFRDQGVVSNRGNLNRH-IRGQKNTVEGKE-PCGCTIGLLI SS D D ITRCN-CKLGMRYINGRKTAMV QV GNC TGV HEVDFNFGCG  
g1 | 2863116 | LREEAQSPAPERLADVPCRYVICWKNDRGAVLGGVIG-DEVTGHTSSVFRDQGVVSNRGNLNRH-IRGQKNTVEGKE-PCGCTIGLLI SS D D ITRCN-CKLGMRYINGRKTAMV QV GNC TGV HEVDFNFGCG  
g1 | 1454714 | LMEALASPEPRLADVPCRYVICWKNDRGAVLGGVIG-DEVTGHTSSVFRDQGVVSNRGNLNRH-IRGQKNTVEGKE-PCGCTIGLLI SS D D ITRCN-CKLGMRYINGRKTAMV QV GNC TGV HEVDFNFGCG  
g1 | 1454724 | PLGHIMRLDLEKIALEYVPCHEVFCYLDNDGEGVGGDGL-ERVKQLHYNIALRDQGVAGPRAGVSKRH-IRGQKNTVEGKE-PCGCTIGLLI SS D D ITRCN-CKLGMRYINGRKTAMV QV GNC TGV HEVDFNFGCG  
g1 | 4694784 | PLGHIMRLDLEKIALEYVPCHEVFCYLDNDGEGVGGDGL-ERVKQLHYNIALRDQGVAGPRAGVSKRH-IRGQKNTVEGKE-PCGCTIGLLI SS D D ITRCN-CKLGMRYINGRKTAMV QV GNC TGV HEVDFNFGCG  
g1 | 4067443 | PLGHIMRLDLEKIALEYVPCHEVFCYLDNDGEGVGGDGL-ERVKQLHYNIALRDQGVAGPRAGVSKRH-IRGQKNTVEGKE-PCGCTIGLLI SS D D ITRCN-CKLGMRYINGRKTAMV QV GNC TGV HEVDFNFGCG  
g1 | 7296772 | ---RERRYEDLCRNISDNYQYLSVDDIGMETGLKLI-NEVRSMYNAQFQDQGVVNTQTPDAPAVRGDKIRGQKNTVEGKE-PCGCTIGLLI SS D D ITRCN-CKLGMRYINGRKTAMV QV GNC TGV HEVDFNFGCG  
g1 | 2317043 | ---NYQYLSVDDIGMETGLKLI-NEVRSMYNAQFQDQGVVNTQTPDAPAVRGDKIRGQKNTVEGKE-PCGCTIGLLI SS D D ITRCN-CKLGMRYINGRKTAMV QV GNC TGV HEVDFNFGCG  
g1 | 2015177 | SFMGGSERRYEDLCRNISDNYQYLSVDDIGMETGLKLI-NEVRSMYNAQFQDQGVVNTQTPDAPAVRGDKIRGQKNTVEGKE-PCGCTIGLLI SS D D ITRCN-CKLGMRYINGRKTAMV QV GNC TGV HEVDFNFGCG  
g1 | 3959333 | VNLHQAMVRLRYIAEIRSNNEFQAVVNDVGSQHYKYTA-KEIELRYELFLFGQGVMEKGNKDESHIK-D-IRSDHEVYDGRDTRAKDAATVRLLSMISLQIHFK-KRIDNDIGGRSAMLIDGNC TGV HEVDFNFGCG  
g1 | 5923812 | LSHQAMVRLRYIAEIRSNNEFQAVVNDVGSQHYKYTA-KEIELRYELFLFGQGVMEKGNKDESHIK-D-IRSDHEVYDGRDTRAKDAATVRLLSMISLQIHFK-KRIDNDIGGRSAMLIDGNC TGV HEVDFNFGCG  
g1 | 2302765 | IPIRALPINKQTLQDLDAMLRVGSINAEAVPASA-HALYQQAQRKRLRPAAGIGRAQSHVDRS-VRQSDSLTA-ES-AGAEVAVAS-SPVQALN-ROLL-LGLFVSEFHF-IRF-PGCGVREDFVQGEA  
g1 | 2299868 | KMDVAETLLQNLHFESV-VOHQRYVYCGQGNLPMLLAHS-VEYVTAQCGVHLRAGVGRAGSHVDRS-VRQSDSLTA-ES-AGAEVAVAS-SPVQALN-ROLL-LGLFVSEFHF-IRF-PGCGVREDFVQGEA  
g1 | 2736175 | ---MKNDAATVAYVDDISEEDVYVDR-DCIP-ENWQKAR-GRNDVTLKATK-IRSDHEVYDGRDTRAKDAATVRLLSMISLQIHFK-KRIDNDIGGRSAMLIDGNC TGV HEVDFNFGCG  
g1 | 2880644 | ---MKNDAATVAYVDDISEEDVYVDR-DCIP-ENWQKAR-GRNDVTLKATK-IRSDHEVYDGRDTRAKDAATVRLLSMISLQIHFK-KRIDNDIGGRSAMLIDGNC TGV HEVDFNFGCG  
g1 | 9658386 | ---MRMADGDAADAVVDDINPQVQVAVR-BCIP-ENWQKAR-GRNDVTLKATK-IRSDHEVYDGRDTRAKDAATVRLLSMISLQIHFK-KRIDNDIGGRSAMLIDGNC TGV HEVDFNFGCG  
g1 | 2434981 | ---MVSQLESVDDVADAVDKVIPELPAHISQVLI-EKQVATTEI-HELKAS-GRGAEQLNPD-IRGQKNTVEGKE-PCGCTIGLLI SS D D ITRCN-CKLGMRYINGRKTAMV QV GNC TGV HEVDFNFGCG  
g1 | 4618777 | TMHAMRISDPHL-LRRDVAANWSQNIQTEALTLVLA-A-CECRKRAAE-LELEPA-CKGPALQIREG-IRGQKNTVEGKE-PCGCTIGLLI SS D D ITRCN-CKLGMRYINGRKTAMV QV GNC TGV HEVDFNFGCG  
g1 | 2885566 | DTMHMRISDPHLLR-DDVAANWSQNIQTEALTLVLA-A-CECRKRAAE-LELEPA-CKGPALQIREG-IRGQKNTVEGKE-PCGCTIGLLI SS D D ITRCN-CKLGMRYINGRKTAMV QV GNC TGV HEVDFNFGCG  
g1 | 2498695 | ---MHISPEHPH-LAAVDDAATHWSQNIQTEALTLVLA-A-CECRKRAAE-LELEPA-CKGPALQIREG-IRGQKNTVEGKE-PCGCTIGLLI SS D D ITRCN-CKLGMRYINGRKTAMV QV GNC TGV HEVDFNFGCG  
g1 | 2306094 | TMHMRISDPHL-LRRDVAANWSQNIQTEALTLVLA-A-CECRKRAAE-LELEPA-CKGPALQIREG-IRGQKNTVEGKE-PCGCTIGLLI SS D D ITRCN-CKLGMRYINGRKTAMV QV GNC TGV HEVDFNFGCG  
g1 | 9946156 | LQTMHMRISDPHL-LRRDVAANWSQNIQTEALTLVLA-A-CECRKRAAE-LELEPA-CKGPALQIREG-IRGQKNTVEGKE-PCGCTIGLLI SS D D ITRCN-CKLGMRYINGRKTAMV QV GNC TGV HEVDFNFGCG  
g1 | 3204348 | ---MHNINWPHL-LRRDVAANWSQNIQTEALTLVLA-A-CECRKRAAE-LELEPA-CKGPALQIREG-IRGQKNTVEGKE-PCGCTIGLLI SS D D ITRCN-CKLGMRYINGRKTAMV QV GNC TGV HEVDFNFGCG  
g1 | 2310577 | RIAMSPISDPHL-LRRDVAANWSQNIQTEALTLVLA-A-CECRKRAAE-LELEPA-CKGPALQIREG-IRGQKNTVEGKE-PCGCTIGLLI SS D D ITRCN-CKLGMRYINGRKTAMV QV GNC TGV HEVDFNFGCG  
g1 | 3410249 | VHSAMKQMTQLQDLDVADAVDKVIPELPAHISQVLI-EKQVATTEI-HELKAS-GRGAEQLNPD-IRGQKNTVEGKE-PCGCTIGLLI SS D D ITRCN-CKLGMRYINGRKTAMV QV GNC TGV HEVDFNFGCG  
g1 | 3957617 | ---MKQNTINLNDLRD-EDDADHWAVASEVDFECLDA-A-CEQNLNSALFNKAS-GRSATTVNAE-IRSDHEVYDGRDTRAKDAATVRLLSMISLQIHFK-KRIDNDIGGRSAMLIDGNC TGV HEVDFNFGCG  
g1 | 2313587 | ---MSSFEFVDSYIETRVGLADVNDLNTLSLR-NHLLIHADNMLAHTGNSQINIVPDKK-VAGDSVSDRS-YYNIHENDVQD-EAFYSLVN-KVCF-TGKIAEFHYTIE-CAAEVREDFVQGEA  
g1 | 2882825 | DLTSNLTATENKTFPKNS-NOPEKCVLITLND-ENLNKIP-THYDYSYQKFNKMLTAG-NGKTDGWDKX-IRSDHEVYDGRDTRAKDAATVRLLSMISLQIHFK-KRIDNDIGGRSAMLIDGNC TGV HEVDFNFGCG
