# Supplementary material
Source: PubMed Central journal article supplement (PMC1502536)
Supplement: pnas_0601283103_5.pdf [file pnas_0601283103_5.pdf]

hPHD2 : LPALKLALLEYIVPCMKHGICVDDFLGKETGQIIGDEVRALHDTGKFTDQGLV/SQK-SDSSKD----IRGDKI 256  
mPHD2 : LPALKLALLEYIVPCMKHGICVDDFLGRETGQIIGDEVRALHDTGKFTDQGLV/SQK-SDSSKD----IRGDKI  
rPHD2 : -----MKHGICVDDFLGRETGQIIGDEVRALHDTGKFTDQGLV/SQK-SDSSKD----IRGDKI  
mPHD1 : SAPERLALDYIVPCMRYYGICVDFNLFGLAVLGGRLVLAELVEALKRGGRLRDGQLV/SQRA-IPPRS----IRGDKI  
hPHD1 : SAPERLALDYIVPCMRYYGICVDFNLFGLAALGGRLVLAELVEALKRGGRLRDGQLV/SQRA-IPPRS----IRGDKI  
mPHD3 : LDLEKIALEYIVPCLHEVGFICYLDNLFGEVWGDVLERVKQLHLYNGALRDGQLAGPRAGVSKRH----LRGDKI  
rPHD3 : LDLEKIALEYIVPCLHEVGFICYLDNLFGEVWGDVLERVKQLHLYNGALRDGQLAGPRAGVSKRH----LRGDKI  
hPHD3 : LDLEKIALEYIVPCLHEVGFICYLDNLFGEVWGDVLERVKQLHCTGALRDGQLAGPRAGVSKRH----LRGDKI  
fatiga B : ERRYEDLCRNIISDMNQYGLSVDDFLGEMETGLRKLINERSMYNAQAFDQGVVNTQTPDAPAVRGDKIRGDKI  
fatiga C : -----MNQYGLSVDDFLGEMETGLRKLINERSMYNAQAFDQGVVNTQTPDAPAVRGDKIRGDKI  
fatiga A : ERRYEDLCRNIISDMNQYGLSVDDFLGEMETGLRKLINERSMYNAQAFDQGVVNTQTPDAPAVRGDKIRGDKI  
mosquito : SDSLDEACRSLIRDMNEYGVCVLDNLFGLQERGGVLDVETGMVYSSGVFRDQGLV/SNRGANNLRH----IRGDKI

hPHD2 : TWIEGKEPGCETIGLLMSMDDLIRHCN----GRLGSRKINGRTRKAMVACYPGNGTGAVREVDNPNPNDGRCVIT 325  
mPHD2 : TWIEGKEPGCETIGLLMSMDDLIRHCS----GRLGNRIRNGRTRKAMVACYPGNGTGAVREVDNPNPNDGRCVIT  
rPHD2 : TWIEGKEPGCETIGLLMSMDDLIRHCS----GRLGNRIRNGRTRKAMVACYPGNGTGAVREVDNPNPNDGRCVIT  
mPHD1 : AHWEGHEPGCRSIGALMAHDAVIRHCA----GRLGNRIRNGRTRKAMVACYPGNGTGLGAVREVDNPNPNDGRCIT  
hPHD1 : AHWEGHEPGCRSIGALMAHDAVIRHCA----GRLGSRVINGRTRKAMVACYPGNGTGLGAVREVDNPNPNDGRCIT  
mPHD3 : TWIEGKEPGCEAIFNLLSUIDRMLVLYCG----SRLGRYVVKERSKAMVACYPGNGTGAVREVDNPNPNDGRCIT  
rPHD3 : TWIEGKEPGCEAIFNLLSUIDRMLVLYCG----SRLGRYVVKERSKAMVACYPGNGTGAVREVDNPNPNDGRCIT  
hPHD3 : TWIEGKEPGCEAIFNLLSUIDRMLVLYCG----SRLGRYVVKERSKAMVACYPGNGTGAVREVDNPNPNDGRCIT  
fatiga B : KHWGGNEPGCSNMYLITNCIDSWYRVNITMKDNGILGNMHIRERTRAMVACYPGSGTHAVREVDNPNPKDGRMIT  
fatiga C : KHWGGNEPGCSNMYLITNCIDSWYRVNITMKDNGILGNMHIRERTRAMVACYPGSGTHAVREVDNPNPKDGRMIT  
fatiga A : KHWGGNEPGCSNMYLITNCIDSWYRVNITMKDNGILGNMHIRERTRAMVACYPGSGTHAVREVDNPNPKDGRMIT  
mosquito : TWIEGKEPGCSSIGYLLINQVDAVITNCKRMENNGKLRGNLIKERTKAMVACYPGSGSHAVREVDNPNRDRGRCIT

hPHD2 : CIYYLNQNDWDARVSGGILRIFPEGK-AQFADIEPRFDRLLFFWSDRRNPHEVDPAYATRYAITWYFDADERAR 398  
mPHD2 : CIYYLNQNDWDARVSGGILRIFPEGK-AQFADIEPRFDRLLFFWSDRRNPHEVDPAYATRYAITWYFDADERAR  
rPHD2 : CIYYLNQNDWDARVSGGILRIFPEGK-AQFADIEPRFDRLLFFWSDRRNPHEVDPAYATRYAITWYFDADERAR  
mPHD1 : CIYYLNQNDVVRVHGGLLCIFPEGR-PVANIEPIFDRLLFFWSDRRNPHEVDPAYATRYAITWYFDADERAA  
hPHD1 : CIYYLNQNDVVRVHGGLLCIFPEGR-PVANIEPIFDRLLFFWSDRRNPHEVDPAYATRYAITWYFDADERAA  
mPHD3 : CIYYLNQNDWDARLHGGVLRIFPEGK-SFVADVEPIFDRLLFFWSDRRNPHEVDPAYATRYAITWYFDADERAE  
rPHD3 : CIYYLNQNDWDARLHGGVLRIFPEGK-SFVADVEPIFDRLLFFWSDRRNPHEVDPAYATRYAITWYFDADERAE  
hPHD3 : CIYYLNQNDWDARLHGGVLRIFPEGK-SFVADVEPIFDRLLFFWSDRRNPHEVDPAYATRYAITWYFDADERAE  
fatiga B : AIYYLNINWDARES GGILRIRPTPG-TTVADIEPRFDRLLFFWSDIRNPHEVDPAHRTRYAITWYFDADEREE  
fatiga C : AIYYLNINWDARES GGILRIRPTPG-TTVADIEPRFDRLLFFWSDIRNPHEVDPAHRTRYAITWYFDADEREE  
fatiga A : AIYYLNINWDARES GGILRIRPTPG-TTVADIEPRFDRLLFFWSDIRNPHEVDPAHRTRYAITWYFDADEREE  
mosquito : AIYYLNLDWDVRS GGILRIFPEGCNDRVADIEPIFDRLLFFWSDRRNPHEVDPAHRTRYAITLWYLDADERES

hPHD2 : AKVKY--LTGERGVRVELNKPDSVSGKDVF----- 426  
mPHD2 : AKVKY--LTGERGVRVELK--PNSVSKDV-----  
rPHD2 : AKVKY--LTGERGVRVELK--PNSVSKDV-----  
mPHD1 : ARDKYQLASGQKGVQVPV/SQPTTPT-----  
hPHD1 : ARDKYQLASGQKGVQVPV/SQPTTPT-----  
mPHD3 : AKKRFRNLTRKTESALAKD-----  
rPHD3 : AKKRFRNLTRKTESALAKD-----  
hPHD3 : AKKRFRNLTRKTESALTED-----  
fatiga B : ALTRAKLENSKTNLAAQAQAQAE PDS TTPPAAPASSA SSLPVSMTGTGALNANVSSNSCATSSEICT--  
fatiga C : ALTRAKLENSKTNLAAQAQAQAE PDS TTPPAAPASSA SSLPVSMTGTGALNANVSSNSCATSSEICT--  
fatiga A : ALTRAKLENSKTNLAAQAQAQAE PDS TTPPAAPASSA SSLPVSMTGTGALNANVSSNSCATSSEICT--  
mosquito : ARURYQDCENRFNSKA-----
