# Supplementary material
Source: PubMed Central journal article supplement (PMC1502536)

**a**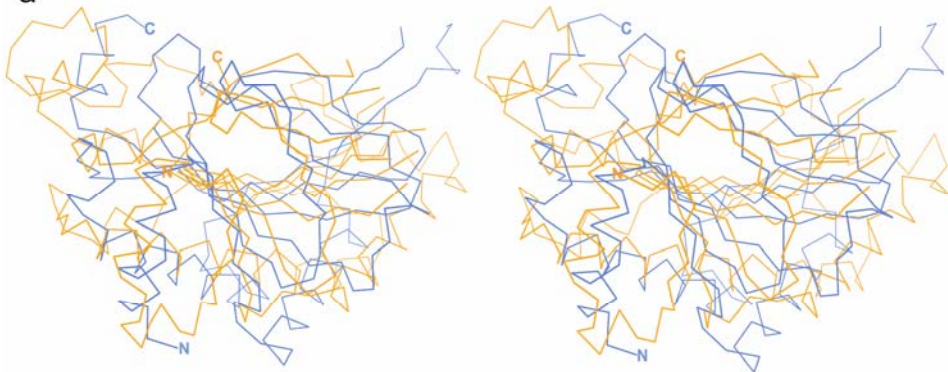**b**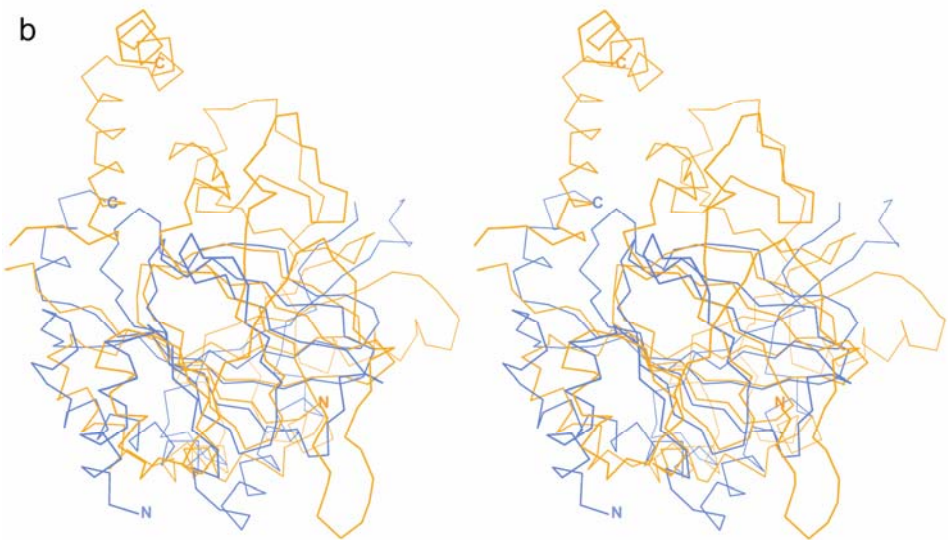

Supplement: pnas_0601283103_1.pdf [file pnas_0601283103_1.pdf]

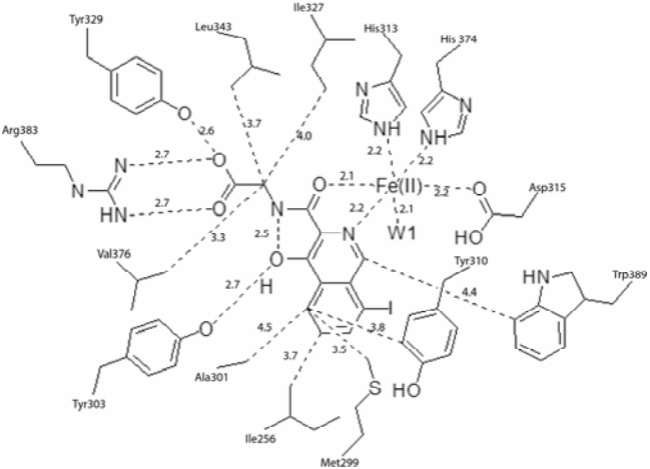

Supplement: pnas_0601283103_2.pdf [file pnas_0601283103_2.pdf]

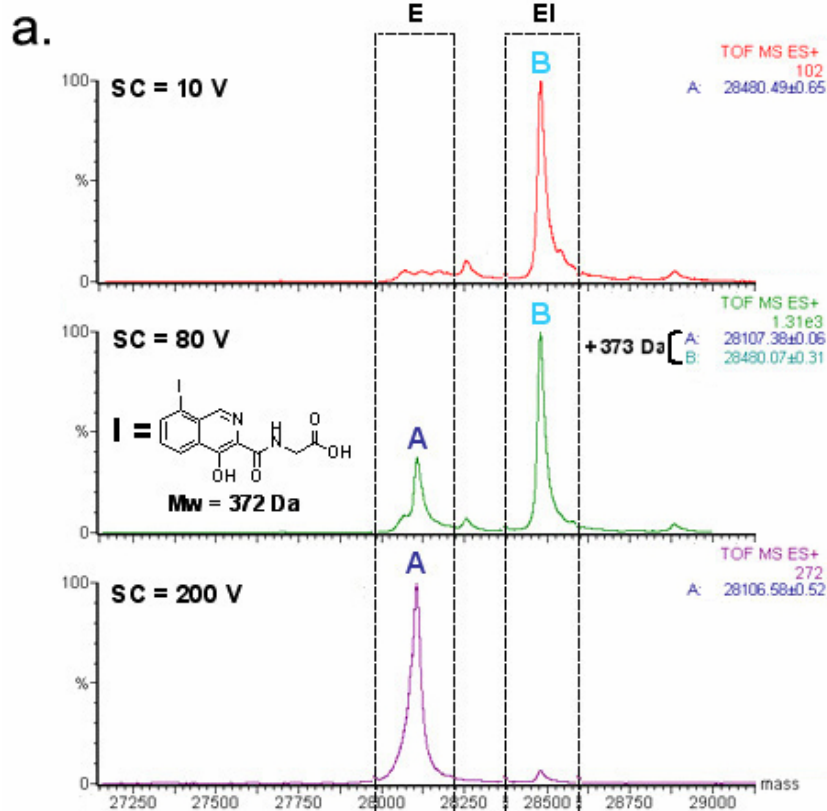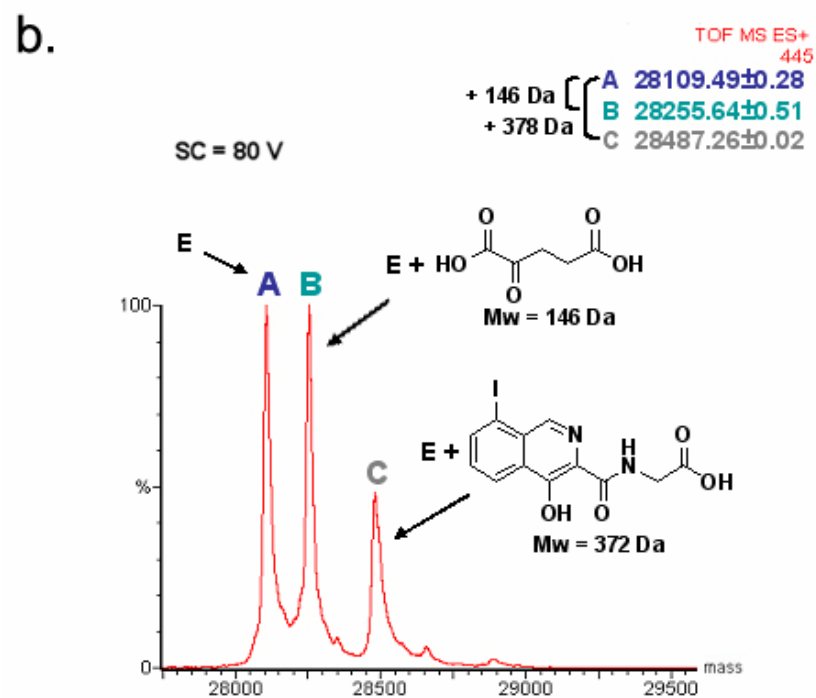

Supplement: pnas_0601283103_3.pdf [file pnas_0601283103_3.pdf]

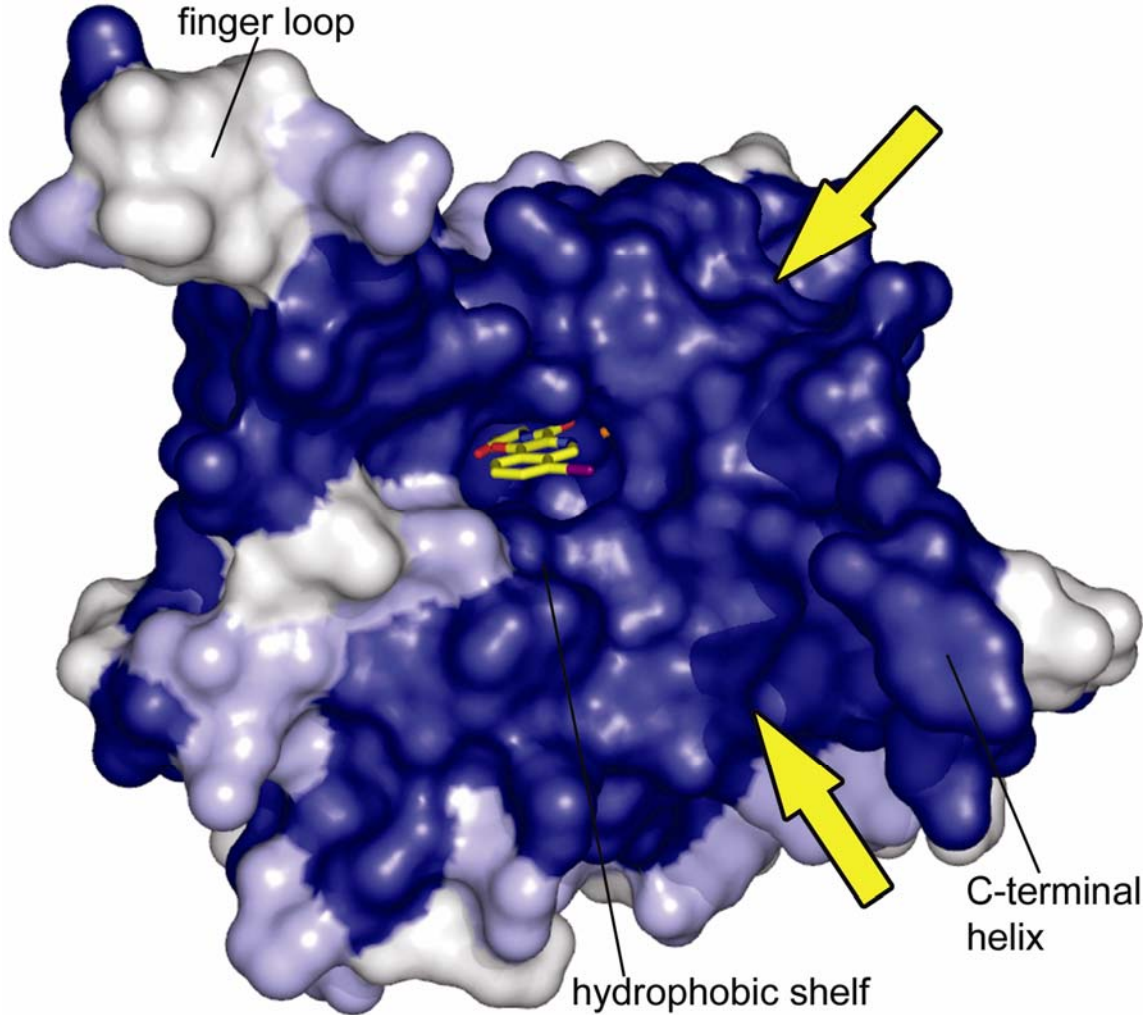

Supplement: pnas_0601283103_6.pdf [file pnas_0601283103_6.pdf]

**a**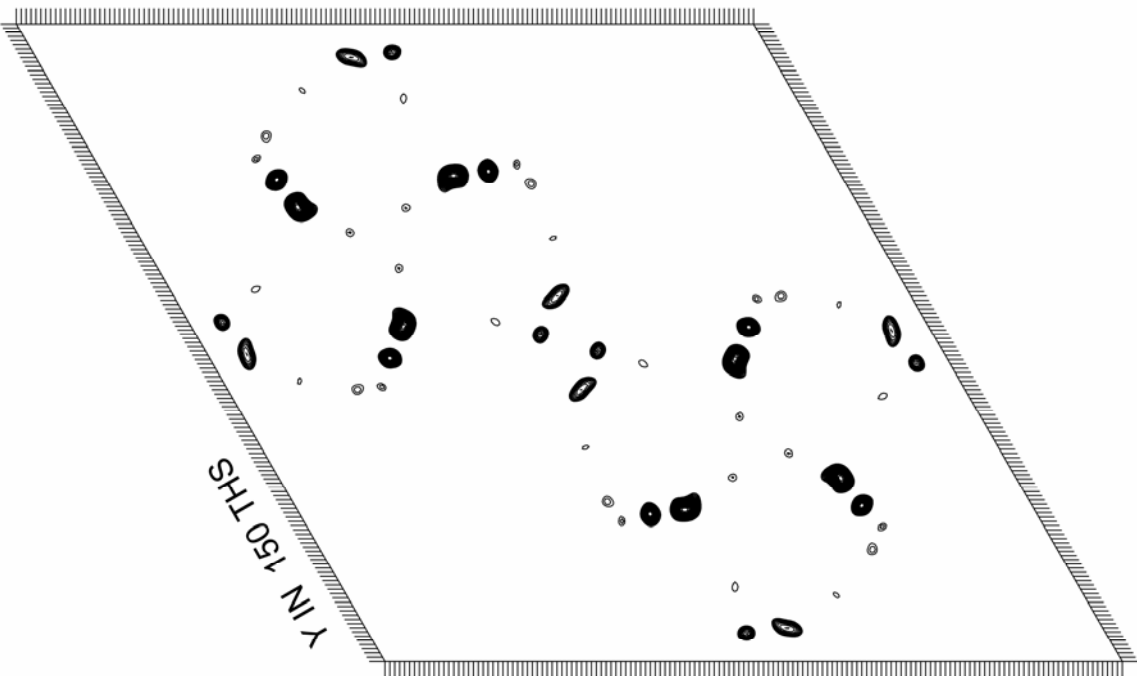

X IN 150 THS

**b**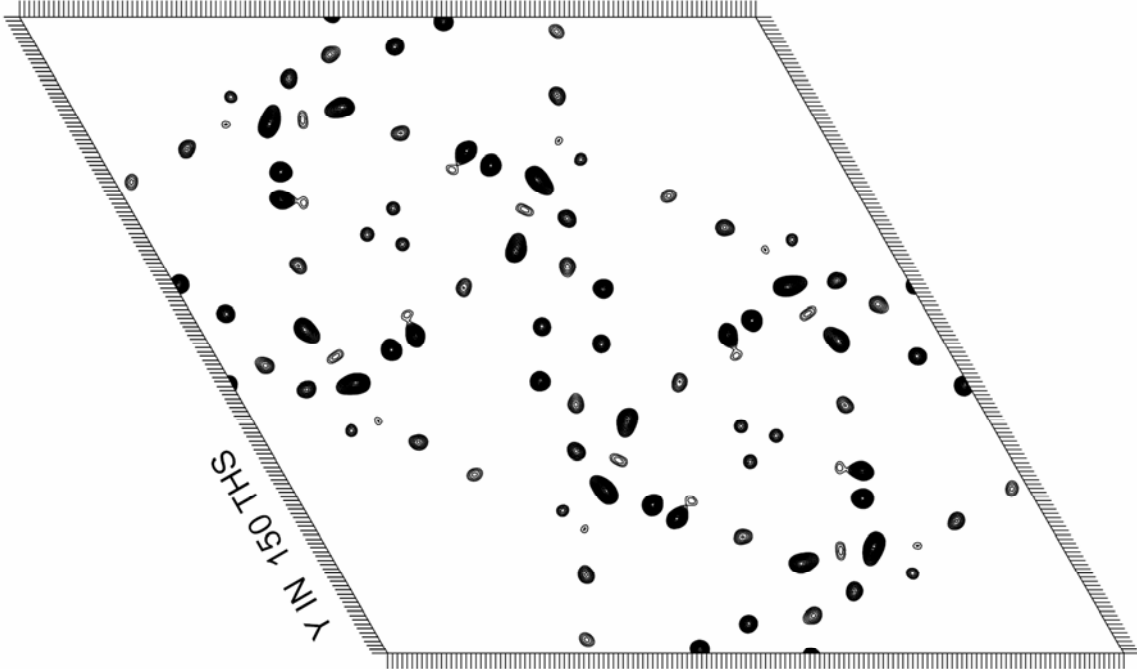

X IN 150 THS

Supplement: pnas_0601283103_7.pdf [file pnas_0601283103_7.pdf]
